# Supplementary material for: Association of lithocholic acid with skeletal muscle hypertrophy through TGR5-IGF-1 and skeletal muscle mass in cultured mouse myotubes, chronic liver disease rats and humans
Source: eLife. 2022 Oct 7;11:e80638. doi: 10.7554/eLife.80638 (PMC9545520; doi:10.7554/eLife.80638)
Supplement: Figure 1—source data 1. — Serum total serum primary BAs, total secondary BAs, cholic acid (CA), chenodeoxycholic acid (CDCA), deoxycholic acid (DCA), and LCA in CLD patients with normal muscle mass and low muscle mass. [file elife-80638-fig1-data1.xlsx]

## Sheet: Sheet1
Total primary BAs	Alb	ALP	PT%		PMI	LCA	LCA ratio			Total primary BAs	Low muscle mass	Normal muscle mass		Total secondary BAs	Low muscle mass	Normal muscle mass		CA	Low muscle mass	Normal muscle mass		CDCA	Low muscle mass	Normal muscle mass		DCA	Low muscle mass	Normal muscle mass		LCA	Low muscle mass	Normal muscle mass
1.94134	4.2	166	94.5		4.77298	0.02264	0.33949				11.4117	13.075			3.0113	1.73662			4.31326	0.17758			3.54009	0.61661			2.04108	0.29607			0.02485	0.03927
6.63813	3.4	3331	88.7		3.82927	0.04729	0.0855505				5.83148	2.08287			1.98654	1.57033			0.49298	0.12462			1.05059	0.21311			0.01123	0.64215			0.01017	0.05269
5.57052	4.2	145	112.8		6.71714	0.03527	0.429559				8.25333	5.57052			6.65774	2.64075			0.48512	1.3389			4.27363	3.61342			1.75784	1.88342			0.07605	0.03527
9.1309	4.3	184	108.1		3.37046	0.02108	0.15854				14.8589	73.8071			4.28335	2.07503			2.37957	0.72572			4.48285	1.14445			1.90609	0.14315			0.12242	0.11669
19.1333	3.5	596	88.7		5.24326	0.03255	0.159118				20.828	63.5387			0.84443	10.6264			2.26627	26.4929			1.16145	26.7425			0.16516	7.25456			0.01223	0.01587
20.7461	3.9	320	90.6		4.8619	0.00673	0.0192467				2.33134	2.87508			2.3964	0.53383			0.12868	0.29399			0.081	2.38677			0.70016	0.23099			0.06892	0.01261
2.47405	4.1	404	78.4		9.06228	0.16057	2.89263				31.5674	24.2294			7.66654	7.52049			4.10761	2.14643			19.2395	15.7662			2.53247	0.02464			0.05712	0.00841
27.0439	2.9	458	56.7		5.96866	0.12955	0.434817				9.80572	3.50085			3.25168	3.66276			0.20115	0.16339			0.2331	0.32297			0.27955	1.83089			0.04706	0.08983
1.98706	4.4	216	105.8		3.64921	0.02365	0.598935				9.1309	17.0022			4.16454	9.00211			3.33119	0.13867			1.85645	0.1204			1.36831	2.11717			0.02108	0.27667
17.0022	4.4	182	107.5		7.21766	0.27667	1.06392				10.8493	13.0198			3.5392	6.11289			0.11446	0.65629			0.09946	8.99672			0.15945	2.93352			0.01976	0.09191
3.6537	3.3	175	75.6		4.88472	0.13388	2.69417				4.76908	31.3131			0.65272	3.78972			0.1717	1.49407			1.17142	4.39778			0.02527	0.13363			0.01695	0.05113
1.36807	4.5	263	102.3		5.23023	0.0197	1.16523				1.98706	25.9441			1.96107	15.8469			0.23976	0.17719			0.29406	0.7841			0.53347	3.39841			0.02365	0.73997
1.3822	4.6	307	83.4		7.74466	0.04135	1.64839				2.27513	17.84			0.98078	5.90628			0.24634	0.50047			0.51282	0.79872			0.02817	0.62407			0.00792	0.09005
5.56992	4.1	199	99.2		4.16382	0.02783	0.399093				28.2956	11.789			6.33653	2.1393			7.40681	3.31417			18.4004	3.55406			4.14371	0.36396			0.01358	0.01922
2.62985	4.3	298	94.5		8.98494	0.0518	0.223184				6.63813	20.756			48.6369	1.19146			0.10274	0.34499			0.28791	0.63345			0.15987	0.05748			0.04729	0.01964
27.9589	3.6	555	89.5		4.15254	0.04847	0.139179				16.1989	1.3822			7.66873	1.12626			4.73651	0.51565			8.93144	0.25949			0.23519	0.66016			0.01092	0.04135
20.756	3.6	425	85.4		7.70979	0.01964	0.0894934				27.9589	14.712			6.86904	3.99501			1.14809	2.20478			8.13163	3.46247			0.79044	0.83041			0.04847	0.04228
13.075	4.2	394	83.5		6.51793	0.03927	0.26514				5.56992	0.68193			1.4036	1.13533			1.51143	0.1172			1.20474	0.37149			0.75194	0.80753			0.02783	0.04075
73.8071	2.6	285	46.1		7.04706	0.11669	0.153773				5.27358	1.4891			35.303	2.22789			0.41355	0.23439			0.40616	0.44108			0.10572	1.22589			0.15883	0.06231
10.3487	4.7	235	84.5		8.95518	0.05352	0.39789				6.96222	10.3487			1.3327	3.10217			0.14067	2.65176			1.49284	2.61045			0.02111	1.27159			0.02105	0.05352
10.6232	3.6	468	67.4		1.61599	0.02081	0.132994				1.30748	2.62985			0.72977	20.5785			0.16028	0.11403			0.70902	0.49885			0.30891	0.12766			0.02258	0.0518
54.6187	3.9	960	83.6		5.33113	0.55448	0.733358				1.94134	2.47405			4.72682	3.07684			0.30734	0.14291			0.46983	0.06683			0.29454	1.16065			0.02264	0.16057
4.76908	4	413	97.4		3.62275	0.01695	0.312544				20.7461	10.1599			14.2398	0.36404			0.43696	0.18626			4.55003	1.83963			0.01746	0.03897			0.00673	0.00784
9.51289	4	307	70.5		5.98294	0.00911	0.0865702				3.6537	3.58196			1.31565	2.84658			0.08355	0.10562			0.04588	0.11455			0.22082	0.73815			0.13388	0.11168
8.16574	4.7	190	115.1		5.87248	0.01849	0.180138				7.10976	0.30221			17.6031	0.47667			2.76802	0.10483			2.6689	0.15248			1.23953	0.40837			0.20146	0.0136
2.53174	3.8	329	92.9		3.38848	0.01915	0.564092				1.36807	27.0439			0.32273	2.74946			0.12334	0.25993			0.02334	3.00196			0.10772	0.50315			0.0197	0.12955
3.17239	4.4	307	112.8		5.99866	0.03299	0.582976				19.1333				1.32457				0.12676				0.4631				0.22236				0.03255
10.8991	4	301	72.2		3.79353	0.01904	0.123221				11.8017				0.19752				0.1315				0.0927				0.05514				0.00688
31.5674	3.6	277	85.9		3.19408	0.05712	0.145588				54.6187				20.9895				0.33014				0.54539				2.26672				0.55448
12.3047	3.5	588	82.7		2.98715	0.08021	0.506733				3.18138				13.8067				0.18026				0.26731				0.21985				0.00908
31.3131	3.7	473	35.8		7.44372	0.05113	0.145649				10.7754				5.79249				0.48587				0.88718				0.93073				0.07044
2.33134	4.4	2272	103.8		2.772	0.06892	1.45781				45.081				3.38337				0.19948				0.29993				0.34286				0.07481
1.4891	4.3	234	94.1		8.63616	0.06231	1.67632				8.16574				2.09689				1.10197				3.54585				0.33607				0.01849
9.80572	4	292	82.7		3.28124	0.04706	0.3604				9.51289				1.00804				0.2626				2.23971				0.02699				0.00911
16.1989	4.3	273	96		3.99408	0.01092	0.0457365				3.17239				2.4868				0.15183				0.16395				0.96897				0.03299
8.25333	3.8	168	94.1		2.59689	0.07605	0.510009				4.69531				2.71192				1.68699				1.44449				1.58144				0.03708
25.9441	4	257	74		7.44795	0.73997	1.77063				10.6232				5.02444				1.01115				2.4484				0.55835				0.02081
20.828	3.8	263	65		2.66547	0.01223	0.0564482				10.7891				18.7387				0.17718				0.44328				0.01102				0.00571
3.50085	4.5	300	99		7.19095	0.08983	1.25399				1.34651				0.12744				0.09078				0.05525				0.06232				0.00768
4.10798	4.6	228	108.3		3.11323	0.01293	0.231419				9.64001				6.20791				1.85633				6.86525				3.35472				0.01728
10.1599	4.5	300	84.4		4.33461	0.00784	0.0744693				12.3047				3.52424				2.03095				2.02007				1.40927				0.08021
24.2294	4.1	280	89.7		7.17397	0.00841	0.0264929				4.10798				1.4803				0.394				0.74559				0.03159				0.01293
10.7754	3.8	273	109.9		5.85014	0.07044	0.425145				6.40465				3.73875				1.24205				3.56107				1.36193				0.02964
10.7891	3.6	621	69.4		1.701	0.00571	0.0193295				2.53174				0.86249				0.1263				0.16153				0.198				0.01915
5.27358	4.5	400	102.3		4.19514	0.15883	0.391423				11.7383				0.07968				0.14156				0.3241				0.03123				0.02545
97.62821*	3.1*	1194*	71.7*		7.260058356*	0.36956*	0.228570301*				10.8991				4.55416				0.15757				0.19868				0.56112				0.01904
6.40465	4.2	290	87.2		3.2718	0.02964	0.292193				6.49448				5.02554				0.15013				0.49803				1.0581				0.18102
0.68193	3.7	286	94.4		8.4355	0.04075	2.24212
5.83148	4.1	890	94.5		2.52449	0.01017	0.130047
45.081	2.9	1133	41		5.85645	0.07481	0.15436
14.8589	3.9	397	111.2		2.6255	0.12242	0.639513
7.10976	4.5	294	103.9		5.0101	0.20146	0.8152
11.7383	2.8	392	56		3.66004	0.02545	0.215341
22.83541*	3.9*	303*	96.3*		2.562351958*	0.01386*	0.016753222*
3.58196	4.3	345	76		4.96434	0.11168	1.73731
63.5387	4.1	692	85.8		7.13951	0.01587	0.021404
3.18138	4.3	243	89.7		5.67368	0.00908	0.0534523
4.69531	4	292	104.3		6.15787	0.03708	0.500554
9.64001	4.9	494	92.8		2.54754	0.01728	0.109032
11.8017	3.2	1724	66		5.26472	0.00688	0.0573726
2.87508	4.8	288	105.7		7.14913	0.01261	0.369791
2.27513	3.6	134	34.2		3.69604	0.00792	0.243259
11.4117	4.5	404	88		2.10965	0.02485	0.172317
18.13398*	3.7*	693*	68.9*		9.315846403*	0.41081*	0.743751512*
6.49448	3.8	614	86.1		3.85902	0.18102	1.57132
6.96222	4.6	157	124		4.2008	0.02105	0.253742
1.30748	4.7	220	89.3		4.48118	0.02258	1.10815
13.0198	4	197	47.4		7.38086	0.09191	0.480381
11.789	4.6	310	88.9		7.55368	0.01922	0.137983
43.1896*	3.1*	178*	100.1*		6.646878622*	0.12322*	0.269227324*
14.712	4.5	271	104.4		7.94147	0.04228	0.22602
28.2956	3.9	362	93		3.69608	0.01358	0.0392061
17.84	3.7	274	81.4		7.53824	0.09005	0.379236
2.08287	4.4	221	99.7		6.62862	0.05269	1.4423
0.30221	4.8	239	107.6		5.13273	0.0136	1.7461
10.8493	4	395	90.6		3.55375	0.01976	0.137347
1.34651	3.9	1410	89.8		1.9353	0.00768	0.521026
