# Supplementary material for: Association of lithocholic acid with skeletal muscle hypertrophy through TGR5-IGF-1 and skeletal muscle mass in cultured mouse myotubes, chronic liver disease rats and humans
Source: eLife. 2022 Oct 7;11:e80638. doi: 10.7554/eLife.80638 (PMC9545520; doi:10.7554/eLife.80638)
Supplement: Figure 2—source data 1. — CLD patient survival curve with total primary BAs and LCA. [file elife-80638-fig2-data1.xlsx]

## Sheet: Sheet1
Total primary BAs	Survival	Deceased		LCA ratio	Survival	Deceased		Time (days)	1st BAs < 10.5	1st BAs ≥ 10.5		Time (days)	LCA ratio < 0.32	LCA ratio ≥ 0.32
	1.94134	5.56992			0.33949	0.399093		2384	0			820	0
	6.63813	2.62985			0.0855505	0.223184		1268	0			161	1
	5.57052	20.756			0.429559	0.0894934		1676	0			1430	0
	9.1309	13.075			0.15854	0.26514		827	0			852	0
	19.1333	73.8071			0.159118	0.153773		1038	0			1492	1
	20.7461	10.6232			0.0192467	0.132994		1037	0			952	0
	2.47405	4.76908			2.89263	0.312544		974	0			1491	0
	27.044	31.5674			0.434817	0.145588		849	0			176	1
	1.98706	2.33134			0.598935	1.45781		1399	0			98	1
	17.0022	20.828			1.06392	0.0564482		1736	0			787	0
	3.6537	10.7754			2.69417	0.425145		1249	0			1371	0
	1.36807	10.7891			1.16523	0.0193295		330	1			1157	0
	1.3822	6.40465			1.64839	0.292193		1218	0			643	1
	27.9589	5.83148			0.139179	0.130047		1065	0			1340	0
	10.3487	45.081			0.39789	0.15436		877	1			1034	0
	54.6187	14.8589			0.733358	0.639513		1199	0			979	1
	9.51289	11.7383			0.0865702	0.215341		1055	0			128	1
	8.16574	3.58196			0.180138	1.73731		1491	0			1439	0
	2.53174	11.8017			0.564092	0.0573726		836	0			1298	1
	3.17239	13.0198			0.582976	0.480381		296	1			877	0
	10.8991	11.789			0.123221	0.137983		1126	0			279	1
	12.3047	14.712			0.506733	0.22602		1065	0			1034	0
	31.3131	28.2956			0.145649	0.0392061		1360	0			123	1
	1.4891				1.67632			1035	1			92	1
	9.80572				0.3604			1173	0			1632	0
	16.1989				0.0457366			941	1			1187	0
	8.25333				0.510009			1157	0			967	0
	25.9441				1.77063			979	1			1187	0
	3.50085				1.25399			149	1			976	1
	4.10798				0.231419			1045	0			877	1
	10.1599				0.0744693			1371	0			1744	1
	24.2294				0.0264929			1737	0			1065	0
	5.27358				0.391423			1394	0			1249	0
	0.681926				2.24212			1187	0			1737	0
	7.10976				0.8152			880	0			166	1
	63.5387				0.021404			1632	0			149	1
	3.18138				0.0534523			1157	0			1035	1
	4.69531				0.500554			1340	0			849		0
	9.64001				0.109032			640	0			640		0
	2.87508				0.369791			787	0			1199		0
	2.27513				0.243259			1187	0			1839		0
	11.4117				0.172317			128		1		1173		0
	6.49448				1.57132			616		1		1187		0
	6.96222				0.253742			161		1		941		1
	1.30748				1.10815			1439		0		616		1
	17.84				0.379236			1034		0		1157		0
	2.08287				1.4423			967		0		1340		0
	0.302206				1.7461			976		1		735		1
	10.8493				0.137347			1298		1		1360		0
	1.34651				0.521026			98		1		1030		0
								1030		0		880		0
								735		1		827		0
								166		1		1065		0
								1744		1		1055		0
								367		1		1399		0
								952		0		367		1
								1272		0		1126		0
								1839		0		1394		0
								1187		0		1272		0
								820		0		1676		0
								643		1		1038		0
								176		1		836		0
								852		0		1736		0
								920		0		330		1
								1340		0		1045		0
								877		0		1037		0
								1492		1		974		0
								1034		0		296		1
								279		1		2384		0
								92		1		920		0
								1126		0		1268		0
								1430		0		1126		0
								123		1		1218		0
