# Supplementary material for: Association of lithocholic acid with skeletal muscle hypertrophy through TGR5-IGF-1 and skeletal muscle mass in cultured mouse myotubes, chronic liver disease rats and humans
Source: eLife. 2022 Oct 7;11:e80638. doi: 10.7554/eLife.80638 (PMC9545520; doi:10.7554/eLife.80638)
Supplement: Figure 3—source data 1. — Serum total bile acids (BAs), cholic acid (CA)/total BAs, chenodeoxycholic acid (CDCA)/total BAs, deoxycholic acid (DCA)/total BAs and lithocholic acid (LCA)/total BAs in CLD and CLD+BCAA rats. [file elife-80638-fig3-data1.xlsx]

## Sheet: Sheet1
Gastrocnemius weight/ body weight
CLD	CLD+BCAA
0.00517909	0.010854
0.0108983	0.01077
0.00944012	0.0114809
0.00955056	0.0109726
0.00952494	0.00945368
0.00954606	0.0111198
0.00966512	0.0111856
0.01	0.0115301
0.0112855
micromol/L
total BAs				CA ratio				CDCA ratio				LCA ratio				DCA ratio
Normal	CLD	CLD+BCAA		Normal	CLD	CLD+BCAA		Normal	CLD	CLD+BCAA		Normal	CLD	CLD+BCAA		Normal	CLD	CLD+BCAA
2.5883	20.4022	5.9279		0.0206727	0.27154	0.00175442		0.00353336	0.0378881	0.00129726		0.003864	0.001314	0.004825		0.0694261	0.17155	0.0264851
2.9665	11.4593	5.7955		0.0086635	0.0679796	0.0809243		0.00228217	0.00337716	0.0171166		0.006573	0.002182	0.004969		0.0216419	0.0543662	0.0647049
20.1557*	10.9218	7.4801			0.156567	0.179142			0.0155652	0.0228607			0.001511	0.002901			0.0541118	0.072459
	59.2233	34.3401			0.185738	0.0687243			0.00580852	0.00297029			0.000814	0.001407			0.0631508	0.0235293
	16.3516	38.9923			0.00366326	0.143105			0.000229948	0.013336			0.001156	0.001375			0.0185304	0.0615506
	17.938	3.6622			0.122644	0.0217083			0.00486118	0.00450549			0.000942	0.00669			0.0574199	0.077276
	79.5561	10.1948			0.0740358	0.269745			0.00194831	7.5038181e-002*			0.000498	0.004179			0.019106	0.119669
	5.2961	37.9181			0.042673	0.0140566			0.0114046	0.000524815			0.004248*	0.000836			0.093654	0.0128435
	23.5972				0.331819				7.2890097e-002*				0.001309				0.143661
Blue letter shows "significant outlier P < 0.05" by Outlier determination using GraphPad
