# Supplementary material for: Association of lithocholic acid with skeletal muscle hypertrophy through TGR5-IGF-1 and skeletal muscle mass in cultured mouse myotubes, chronic liver disease rats and humans
Source: eLife. 2022 Oct 7;11:e80638. doi: 10.7554/eLife.80638 (PMC9545520; doi:10.7554/eLife.80638)
Supplement: Figure 4—source data 1. [file elife-80638-fig4-data1.xlsx]

## Sheet: Sheet1
Ratio																Ratio
LCA 0 length					LCA 70 length					LCA 700 length						LCA 0 WIDE					LCA 70 WIDE					LCA 700 WIDE
1	2	3	4	5	1	2	3	4	5	1	2	3	4	5		1	2	3	4	5	1	2	3	4	5	1	2	3	4	5
0.761299	2.44698	0.700869	0.549706	2.32405	0.865574	0.589393	1.50158	0.730917	1.04799	1.16378	2.44617	2.26103	3.81343	1.46271		1.49848	1.14391	0.866646	0.884333	1.92983	1.2506	1.3199	0.947732	0.967926	1.0033	1.26363	1.58634	2.40173	1.51388	2.041
0.589285	1.45497	1.327	0.749055	1.50942	1.29214	0.658843	1.09924	0.88574	1.03448	1.24977	1.97265	1.34875	1.25135	2.04665		0.866646	0.79194	0.52796	0.947732	1.08843	2.17863	1.02992	0.95178	0.879933	0.756962	1.631	1.75987	2.6398	1.93783	0.983809
1.65228	0.81978	0.401943	0.682301	1.97912	1.4606	1.33328	0.787908	1.79156	0.629844	1.29742	3.99739	2.43288	0.585018	3.68415		0.87109	1.02992	0.905935	1.37732	1.08843	1.80549	0.905935	0.935369	1.66026	1.07048	1.72533	2.25373	1.81191	2.47794	2.343
0.678148	0.973533	1.19287	1.16812	1.03181	1.86888	1.64788	0.833526	0.839289	1.02894	4.62429	2.90931	4.9906	0.719675	2.21635		1.1473	0.834793	0.97193	1.05957	1.05957	1.22561	0.879933	1.74218	0.811254	0.879933	2.21369	1.59365	1.75987	2.73347	0.97193
1.00303	0.817191	1.21896	1.21278	1.82466	0.493707	1.18774	0.728985	0.790752	2.44344	2.10206	1.59272	2.0922	1.26198	3.35088		1.0033	2.20159	0.670157	0.787056	0.670157	1.3199	0.879933	0.79194	1.43244	2.39368	1.13903	1.53672	2.1572	1.81403	1.18056
1.18639	1.025	1.69627	0.913437	0.791404	1.25386	0.542658	3.19071	1.50055	1.2497	3.29556	1.71509	1.4442	2.03252	2.52926		0.811254	0.703947	1.02992	0.967926	0.811254	1.33156	0.709446	0.670157	0.947732	1.61534	1.36821	1.2444	1.30811	1.49589	1.49848
0.453296	1.41994	0.65767	0.923574	0.717885	1.24662	0.742425	1.25703	1.2113	1.27609	2.64186	2.16571	1.90657	1.78654	2.39961		0.756962	0.622201	0.796823	0.703947	1.39131	1.05957	0.905935	1.25989	0.756962	2.59989	1.71028	0.935369	2.14818	1.25989	1.15738
1.33938	0.78325	0.92988	1.03374	0.723143	1.0979	1.17552	0.755203	1.83672	0.789211		1.04073	3.82936	2.06567	1.51892		0.709446	1.3199	0.879933	1.05957	1.46452	2.34797	0.670157	1.06322	0.918694	1.08843		3.42721	1.45123	1.53927	1.6742
1.09086	0.782837	0.736957	0.566733	1.17868	1.71513	1.62338	0.699402	0.736606	0.440802		1.17387	1.33496	1.90401	2.55934		0.87109	0.535263	1.05957	0.879933	0.373312	1.44318	0.834793	1.02618	1.02618	1.32285		1.30811	2.07673	1.44318	1.46452
0.683429	0.966982	0.842343	0.632382	0.931535	0.706711	1.31231	1.97392	2.31137	0.649024		2.87729		2.14018	2.10019		1.34317	0.967926	0.97193	0.756962	1.23503	1.19684	0.95178	1.11303	1.11303	1.53927		2.64125		1.25989	1.2444
1.2229	0.72669	1.17562	0.813729	0.780621	0.623282	0.889792	2.52405	1.87372	0.96811		1.37865		3.10554	2.26061		1.26904	2.37745	0.448678	0.615953	0.897356	1.88314	1.26904	0.947732	0.497778	0.879933		1.3199		1.41062	1.70852
1.24208	0.676153	0.934838	0.612896	0.668612	0.895549	0.940657	0.915754	1.50955	4.17334		3.39836		5.3314	1.97161		2.0542	1.81403	0.884333	0.615953	0.879933	1.43244	1.49848	0.439967	0.622201	1.84786		2.6251		5.15192	1.77953
0.875241	0.748369	0.930362	1.59404	0.634614	1.61067	2.17446	0.880505	3.03543	1.02494		2.77035			2.66552		1.0033	1.41885	0.703947	1.33156	1.3199	1.36887	1.08843	1.49589	2.041	1.05957		2.22781			0.687228
0.794322	1.03721	1.03374	1.43533	0.952194	0.980695	1.029	1.18314	0.714298	0.856027		0.76458			1.4861		0.709446	1.02618	1.11998	1.43244	0.87109	1.53672	1.10256	2.05236	1.02618	0.796823		2.6471			1.30811
1.29457	0.665144	1.37085	0.733898	1.2967	2.07578	2.47685	1.65783	0.610267	1.65922		0.827345			1.91098		0.497778	1.23191	1.2506	1.05957	1.6926	1.22561	1.2444	0.830129	1.07048	2.041		2.0542			2.41621
0.573493	0.959044	0.950437	1.00424	1.1271	0.910689	1.62532	1.27473	0.886681	1.65197		3.73208			1.41151		0.746667	0.687228	1.0033	0.811254	0.439967	1.2444	1.1473	1.30811	0.830129	1.75987		2.45123			2.32311
0.890585	0.732322	1.32279	0.925104	0.829979	1.33304	2.05963	0.763991	1.66706	2.24427		2.69821					0.590259	1.07048	0.439967	1.19684	1.43244	1.2444	1.30811	0.725593	0.439967	3.03419		2.343
0.609213	0.412505	1.39646	0.730657		2.8331	1.38432		1.16657	3.68387							0.709446	1.19684	1.3199	0.640591		2.09895	0.947732		1.12684	2.38233
1.4091	1.08253		0.573493		1.68182	0.708434		0.582491	2.86484							0.556514	1.07409		0.983809		2.25373	1.25989		1.12684	1.81403
1.07509	0.907227				1.96767	1.09942		1.27105	0.918202							0.709446	0.935369				1.30811	1.1473		1.19684	0.947732
	0.657087				1.32259	0.578842		4.40144	1.04461								0.811254				1.57407	0.983809		2.4701	0.95178
	1.50465				0.76003	0.854378			1.75926								0.87109				1.19684	1.61534			2.55181
					0.961719	3.51132			0.906592												2.73347	1.58634			2.343
					0.905527																1.55924
					3.81247																0.95178
