# Supplementary material for: Association of lithocholic acid with skeletal muscle hypertrophy through TGR5-IGF-1 and skeletal muscle mass in cultured mouse myotubes, chronic liver disease rats and humans
Source: eLife. 2022 Oct 7;11:e80638. doi: 10.7554/eLife.80638 (PMC9545520; doi:10.7554/eLife.80638)
Supplement: Figure 5—source data 1. [file elife-80638-fig5-data1.xlsx]

## Sheet: Sheet1
GAPDH raw data											Ratio (pAkt/Akt)					GAPDH raw data										Ratio (p-mTOR/mTOR)
											Control	TGR5 agonist (INT-777)														Control	TGR5 agonist (INT-777)
											0.0862649	0.162484														0.146366	1.73181
											0.0942681	0.184488														0.392772	0.491519
											0.0933509	0.138632														1.14256	0.915467
Akt raw data
																mTOR raw data
p-Akt raw data
																p-mTOR raw data
membrane
