# Supplementary material for: Association of lithocholic acid with skeletal muscle hypertrophy through TGR5-IGF-1 and skeletal muscle mass in cultured mouse myotubes, chronic liver disease rats and humans
Source: eLife. 2022 Oct 7;11:e80638. doi: 10.7554/eLife.80638 (PMC9545520; doi:10.7554/eLife.80638)
Supplement: Table 1—source data 1. [file elife-80638-table1-data1.xlsx]

## Sheet: Sheet1
	Albumin	Total bilirubin	ALBI	Prothrombin time	PMI
	4.2	0.5	-2.9549	94.5	4.77298
	3.4	0.6	-2.22264	88.7	3.82927
	4.2	0.8	-2.82018	112.8	6.71714
	4.3	0.6	-2.98764	108.1	3.37046
	3.5	0.6	-2.30764	88.7	5.24326
	3.9	0.6	-2.64764	90.6	4.8619
	4.1	0.9	-2.70142	78.4	9.06228
	2.9	1.7	-1.49913	56.7	5.96866
	4.4	0.7	-3.02846	105.8	3.64921
	4.4	0.7	-3.02846	107.5	7.21766
	3.3	0.6	-2.13764	75.6	4.88472
	4.5	0.5	-3.2099	102.3	5.23023
	4.6	0.9	-3.12642	83.4	7.74466
	4.1	0.6	-2.81764	99.2	4.16382
	4.3	0.8	-2.90518	94.5	8.98494
	3.6	0.8	-2.31018	89.5	4.15254
	3.6	0.7	-2.34846	85.4	7.70979
	4.2	1.6	-2.6215	83.5	6.51793
	2.6	2.5	-1.13358	46.1	7.04706
	4.7	1.1	-3.1539	84.5	8.95518
	3.6	0.8	-2.31018	67.4	1.61599
	3.9	1.6	-2.3665	83.6	5.33113
	4	0.8	-2.65018	97.4	3.62275
	4	1.8	-2.41774	70.5	5.98294
	4.7	1	-3.18122	115.1	5.87248
	3.8	1.3	-2.34102	92.9	3.38848
	4.4	0.5	-3.1249	112.8	5.99866
	4	1.4	-2.48978	72.2	3.79353
	3.6	1	-2.24622	85.9	3.19408
	3.5	1	-2.16122	82.7	2.98715
	3.7	1.1	-2.3039	35.8	7.44372
	4.4	1.2	-2.87396	103.8	2.772
	4.3	1.1	-2.8139	94.1	8.63616
	4	1.1	-2.5589	82.7	3.28124
	4.3	0.7	-2.94346	96	3.99408
	3.8	1.1	-2.3889	94.1	2.59689
	4	1.4	-2.48978	74	7.44795
	3.8	3.4	-2.06545	65	2.66547
	4.5	0.7	-3.11346	99	7.19095
	4.6	1.3	-3.02102	108.3	3.11323
	4.5	0.9	-3.04142	84.4	4.33461
	4.1	1.4	-2.57478	89.7	7.17397
	3.8	0.5	-2.6149	109.9	5.85014
	3.6	1.5	-2.13	69.4	1.701
	4.5	1.1	-2.9839	102.3	4.19514
	4.2	0.5	-2.9549	87.2	3.2718
	3.7	1.1	-2.3039	94.4	8.4355
	4.1	0.6	-2.81764	94.5	2.52449
	2.9	1	-1.65122	41	5.85645
	3.9	1.6	-2.3665	111.2	2.6255
	4.5	0.5	-3.2099	103.9	5.0101
	2.8	1	-1.56622	56	3.66004
	4.3	0.9	-2.87142	76	4.96434
	4.1	0.2	-3.13254	85.8	7.13951
	4.3	0.5	-3.0399	89.7	5.67368
	4	0.7	-2.68846	104.3	6.15787
	4.9	0.6	-3.49764	92.8	2.54754
	3.2	1.7	-1.75413	66	5.26472
	4.8	1.8	-3.09774	105.7	7.14913
	3.6	2.4	-1.99528	34.2	3.69604
	4.5	0.6	-3.15764	88	2.10965
	3.8	1.1	-2.3889	86.1	3.85902
	4.6	1	-3.09622	124	4.2008
	4.7	1.4	-3.08478	89.3	4.48118
	4	0.9	-2.61642	47.4	7.38086
	4.6	0.4	-3.35886	88.9	7.55368
	4.5	0.7	-3.11346	104.4	7.94147
	3.9	0.6	-2.64764	93	3.69608
	3.7	0.8	-2.39518	81.4	7.53824
	4.4	0.3	-3.27132	99.7	6.62862
	4.8	0.7	-3.36846	107.6	5.13273
	4	0.9	-2.61642	90.6	3.55375
	3.9	1.2	-2.44896	89.8	1.9353
