# Supplementary material for: Association of lithocholic acid with skeletal muscle hypertrophy through TGR5-IGF-1 and skeletal muscle mass in cultured mouse myotubes, chronic liver disease rats and humans
Source: eLife. 2022 Oct 7;11:e80638. doi: 10.7554/eLife.80638 (PMC9545520; doi:10.7554/eLife.80638)
Supplement: Table 2—source data 1. [file elife-80638-table2-data1.xlsx]

## Sheet: Sheet1
CA	GCA	TCA	DCA	GDCA	TDCA	CDCA	GCDCA	TCDCA	LCA	GLCA	TLCA	UDCA	GUDCA	TUDCA	Total of primary BAs	Total of secondary BAs	Total BA
0.307338	0.202653	0.00997599	0.294538	0.207826	0.0166022	0.469829	0.909043	0.0424997	0.0226377	0.00020734	0.000776075	0.985956	3.1778	0.020478	1.94134	4.72682	6.66816
0.102741	1.03626	0.11828	0.159866	0.946807	0.0514021	0.287914	4.55953	0.533394	0.0472881	0.0601197	0.00712438	9.12344	37.2124	1.0285	6.63813	48.6369	55.2751
1.3389	0.0121959	0.000528919	1.88342	0.211721	0.000269527	3.61342	0.590847	0.0146342	0.0352723	9.85971e-05	0.000849249	0.382782	0.126138	0.000193366	5.57052	2.64075	8.21127
3.33119	1.08805	0.176175	1.36831	0.80682	0.0579792	1.85645	2.30821	0.37083	0.0210786	0.00306824	0.000258237	0.645227	1.2478	0.0139952	9.1309	4.16454	13.2954
0.126764	1.48472	2.36063	0.222356	0.365402	0.642721	0.463105	3.46415	11.2339	0.0325522	0.00350062	0.00236634	0.0159186	0.0237059	0.0160458	19.1333	1.32457	20.4578
0.436958	1.624	0.0511197	0.017455	0.0231014	0.000423969	4.55003	13.0127	1.07128	0.00673364	0.00012233	0.00015373	3.10327	10.9596	0.128995	20.7461	14.2398	34.9859
0.14291	0.806024	0.16219	1.16065	1.28426	0.208668	0.0668293	0.863062	0.433034	0.160567	0.0214206	0.0051433	0.0854669	0.145502	0.00516937	2.47405	3.07684	5.55089
0.25993	2.00384	0.629749	0.503154	1.06823	0.196742	3.00196	14.0747	7.07377	0.129547	0.0220956	0.00406035	0.228421	0.585872	0.0113417	27.044	2.74946	29.7934
0.239764	0.285599	0.00484534	0.533472	0.738731	0.0069468	0.29406	1.10882	0.0539688	0.0236467	0.000116305	0.00011864	0.161341	0.496189	0.000508626	1.98706	1.96107	3.94813
0.138673	5.38064	0.634769	2.11717	4.79361	1.11542	0.120402	8.43087	2.29687	0.276666	0.057361	0.00450072	0.0441223	0.585527	0.00773896	17.0022	9.00211	26.0043
0.0835512	0.18929	0.0246903	0.220818	0.480365	0.12559	0.0458839	2.34318	0.967104	0.133883	0.00859831	0.000936641	0.0294923	0.314751	0.00121572	3.6537	1.31565	4.96935
0.123344	0.0318123	0.731218	0.107717	0.115803	0.00526844	0.0233428	0.387561	0.070795	0.0197018	0.0014256	0.000692813	0.0276658	0.0438523	0.000603899	1.36807	0.322731	1.6908
0.515648	0.113453	0.0039708	0.660159	0.3091	0.00113392	0.259494	0.477054	0.0125795	0.0413491	0.0135727	0.000406475	0.0607833	0.0394134	0.000345143	1.3822	1.12626	2.50846
1.51143	0.786541	0.129191	0.751944	0.534028	0.0407321	1.20474	1.49041	0.447601	0.0278308	0.00026	0.000402737	0.0348212	0.0133627	0.000216851	5.56992	1.4036	6.97352
0.114026	0.0574218	0.00678874	0.127664	0.143171	0.00225541	0.498847	1.47522	0.477541	0.0517974	0.00484316	0.000241062	4.2806	15.468	0.499908	2.62985	20.5785	23.2084
1.14809	1.19956	0.30503	0.790436	1.45253	0.520919	8.13163	11.2551	5.91942	0.0484731	0.00115746	0.000178238	1.66109	2.29046	0.103802	27.9589	6.86904	34.8279
0.344988	3.83805	1.29098	0.0574845	0.424524	0.222114	0.633448	7.70037	6.94819	0.0196416	0.00704689	0.000170183	0.0389623	0.393989	0.0275309	20.756	1.19146	21.9475
0.177576	2.67308	0.632145	0.296069	0.573529	0.184351	0.616615	6.13802	2.83759	0.0392716	0.00207034	0.000214881	0.122195	0.516924	0.00199317	13.075	1.73662	14.8116
0.725718	15.084	2.77404	0.143152	1.02661	0.246581	1.14445	31.7506	22.3283	0.116686	0.0274744	0.00215101	0.0307041	0.479186	0.00248226	73.8071	2.07503	75.8821
2.65176	1.04625	0.00805672	1.27159	1.1615	0.00207977	2.61045	3.88901	0.143196	0.0535197	0.0205575	0.00110701	0.17231	0.419067	0.000441235	10.3487	3.10217	13.4509
1.01115	1.17564	0.0417867	0.558348	0.55595	0.0451622	2.4484	5.19938	0.746821	0.0208103	8.48578e-05	8.07427e-05	1.32427	2.4811	0.0386258	10.6232	5.02444	15.6476
0.330144	15.1522	2.07988	2.26672	13.9054	3.08468	0.545389	28.5007	8.01045	0.554479	0.200791	0.0658416	0.146315	0.736304	0.0289666	54.6187	20.9895	75.6082
0.171695	0.462812	0.00457005	0.0252702	0.0193888	0.000475053	1.17142	2.63629	0.322288	0.0169455	0.000157473	0.000177202	0.214294	0.375767	0.000241899	4.76908	0.652717	5.4218
0.262596	1.56045	0.083943	0.0269869	0.0108809	0.00109468	2.23971	4.46206	0.90412	0.00910799	0.000120749	0.000493009	0.369117	0.586439	0.00380028	9.51289	1.00804	10.5209
1.10197	0.301035	0.000430748	0.336068	0.25178	0.000625432	3.54585	3.14959	0.0668595	0.0184869	0.00026181	0.00106057	0.674796	0.812451	0.00135851	8.16574	2.09689	10.2626
0.126303	0.369724	0.0228178	0.197998	0.110454	0.00331062	0.161533	1.42425	0.427115	0.0191466	0.000140004	0.000123031	0.15272	0.376475	0.00212103	2.53174	0.862488	3.39423
0.151833	0.911198	0.0159298	0.968968	1.06761	0.0937662	0.16395	1.78271	0.146778	0.0329917	0.031833	0.000720964	0.0755683	0.215112	0.000235747	3.17239	2.4868	5.6592
0.157571	2.91758	0.462179	0.56112	1.22664	0.317847	0.198685	5.26785	1.8952	0.0190416	0.000326267	0.000269559	0.411075	1.89467	0.123179	10.8991	4.55416	15.4532
4.10761	0.90778	0.01633	2.53247	0.94374	0.01855	19.2395	6.62676	0.66941	0.05712	0.02903	0.00043	2.83215	1.25223	0.00082	31.5674	7.66654	39.2339
2.03095	2.66685	0.194759	1.40927	1.32363	0.104502	2.02007	4.10436	1.28771	0.0802105	0.0557033	0.00104812	0.126464	0.420758	0.00264964	12.3047	3.52424	15.8289
1.49407	4.06418	0.635847	0.133633	0.4776	0.0993531	4.39778	13.4213	7.29996	0.0511271	0.00216162	8.33975e-05	0.619044	2.2188	0.187915	31.3131	3.78972	35.1028
0.128682	0.206669	0.0100702	0.700162	0.964309	0.129603	0.0809991	1.60563	0.299293	0.0689212	0.077016	0.00203179	0.119604	0.330578	0.00417232	2.33134	2.3964	4.72774
0.234386	0.25064	0.0136556	1.22589	0.770368	0.0532481	0.441083	0.450281	0.0990551	0.0623087	0.000316468	9.72768e-05	0.0727597	0.0424949	0.000411725	1.4891	2.22789	3.71699
0.201146	2.39911	0.175887	0.279549	1.95033	0.189905	0.233102	5.80605	0.990428	0.0470588	0.0218544	0.00016138	0.0560397	0.706127	0.00065053	9.80572	3.25168	13.0574
4.73651	0.445948	0.00143322	0.23519	0.0810215	0.000375136	8.93144	1.99207	0.0914698	0.0109162	6.33571e-05	0.000263733	4.84271	2.49154	0.00664487	16.1989	7.66873	23.8676
0.485119	0.346391	0.00712019	1.75784	1.14823	0.0261427	4.27363	2.79594	0.345127	0.0760477	0.0166044	0.000702175	1.67357	1.94647	0.0121348	8.25333	6.65774	14.9111
0.177186	2.9858	0.454511	3.39841	6.0076	0.871092	0.784101	17.9602	3.5823	0.739966	0.301813	0.0908698	0.737706	3.61437	0.0851187	25.9441	15.8469	41.7911
2.26627	10.3009	0.76026	0.165163	0.169321	0.0124165	1.16145	5.22165	1.11751	0.0122337	0.000136498	0.000193515	0.160822	0.320632	0.00350831	20.828	0.844426	21.6725
0.163386	0.848852	0.0180669	1.83089	0.936779	0.0328189	0.322971	1.96583	0.181742	0.0898309	0.00853977	0.000225852	0.392593	0.37079	0.000286133	3.50085	3.66276	7.16361
0.393996	0.380041	0.000639051	0.0315875	0.00145461	0.00105199	0.745587	2.5427	0.0450143	0.0129323	0.000303698	0.000408497	0.310004	1.12191	0.000647	4.10798	1.4803	5.58827
0.186259	0.844233	0.0262467	0.038973	0.00684029	0.000632224	1.83963	6.28774	0.975824	0.00783714	0.00021828	8.45216e-05	0.0924795	0.215804	0.00117537	10.1599	0.364044	10.524
2.14643	0.496753	0.0067535	0.024639	0.00508578	0.000740199	15.7662	5.46185	0.351362	0.00841145	8.89806e-05	9.96939e-05	4.80375	2.67489	0.00278443	24.2294	7.52049	31.7499
0.485868	1.74041	0.16284	0.930729	3.15886	0.465009	0.887179	6.56078	0.938306	0.0704375	0.185322	0.000792836	0.137544	0.842644	0.00115132	10.7754	5.79249	16.5679
0.177179	3.63515	0.786067	0.0110153	0.00184391	0.000767528	0.443277	4.09921	1.6482	0.00570758	0.000433049	0.000305602	1.14842	15.9968	1.57336	10.7891	18.7387	29.5278
0.413546	0.601412	0.0897822	0.105716	0.154029	0.000655037	0.406157	2.94163	0.821053	0.158826	0.0324682	0.00160222	14.4093	19.6091	0.831284	5.27358	35.303	40.5765
1.24205	0.130321	0.00118733	1.36193	0.30435	0.00217388	3.56107	1.35195	0.11807	0.0296383	0.0191777	0.000307287	1.33739	0.681896	0.00189079	6.40465	3.73875	10.1434
0.117205	0.0220558	0.00123231	0.807527	0.108631	0.000616777	0.371495	0.16774	0.00219767	0.040745	0.000498998	0.000529638	0.154999	0.0213847	0.000392995	0.681926	1.13533	1.81725
0.492979	1.06225	0.0620284	0.0112256	0.000632764	0.000520223	1.05059	2.81811	0.34551	0.0101671	0.000129503	0.000476674	0.498112	1.45253	0.0127425	5.83148	1.98654	7.81801
0.199484	7.34668	5.14478	0.342864	1.18588	1.7034	0.299934	11.4545	20.6356	0.0748096	0.00163079	0.00258449	0.00973819	0.0512161	0.0112416	45.081	3.38337	48.4644
2.37957	1.34327	0.365178	1.90609	1.05096	0.331935	4.48285	3.90499	2.38307	0.122417	0.0480814	0.000670989	0.452413	0.362007	0.00877649	14.8589	4.28335	19.1423
2.76802	0.345922	0.000969731	1.23953	0.402014	0.00124246	2.6689	1.30145	0.0244944	0.201459	0.0435889	6.14015e-05	8.79927	6.87715	0.0388079	7.10976	17.6031	24.7129
0.141557	1.2562	0.276777	0.0312315	0.0113146	0.00172671	0.324099	6.91049	2.82918	0.025449	0.000103949	0.000153067	0.00742745	0.00219626	7.3989e-05	11.7383	0.0796765	11.818
0.105616	1.22525	0.220443	0.738152	1.62251	0.204361	0.114555	1.51689	0.399208	0.111684	0.00352673	0.000206011	0.0489687	0.116088	0.00108062	3.58196	2.84658	6.42854
26.4929	4.73308	0.10619	7.25456	2.19252	0.035174	26.7425	4.60301	0.861013	0.0158743	0.00109355	8.78716e-05	1.03299	0.0935784	0.000567607	63.5387	10.6264	74.1652
0.180264	0.588032	0.0143599	0.219852	0.24073	0.00381145	0.267307	2.03377	0.097652	0.00908052	0.000364578	1.506e-05	4.85765	8.29781	0.177402	3.18138	13.8067	16.9881
1.68699	0.42301	0.0137921	1.58144	0.778729	0.0277943	1.44449	0.987609	0.13942	0.0370773	0.00308832	6.02304e-05	0.153288	0.130105	0.000347968	4.69531	2.71192	7.40724
1.85633	0.293438	0.00131733	3.35472	0.510004	0.0207239	6.86525	0.512969	0.110699	0.0172793	0.000199196	0.000167888	2.00667	0.297536	0.000598802	9.64001	6.20791	15.8479
0.131495	0.320567	1.38674	0.0551351	0.0340512	0.055663	0.0926979	2.4215	7.44875	0.00688429	0.000151686	8.23083e-05	0.0102702	0.034006	0.00127869	11.8017	0.197522	11.9993
0.293987	0.00523869	0.000779523	0.230992	0.000700668	0.000624723	2.38677	0.184763	0.00354254	0.0126058	0.000386446	0.000139641	0.274226	0.0115705	0.00258903	2.87508	0.533835	3.40891
0.246342	0.0369111	0.000494161	0.0281684	0.0025603	0.000357747	0.512818	1.47802	0.000547079	0.00792028	3.4436e-05	3.04085e-05	0.218058	0.723488	0.000159837	2.27513	0.980778	3.25591
4.31326	0.518542	0.0169642	2.04108	0.613487	0.00152241	3.54009	2.88133	0.14147	0.0248532	0.0433519	0.000721053	0.193121	0.0930189	0.000151011	11.4117	3.0113	14.423
0.150129	1.624	0.146437	1.0581	3.1118	0.363509	0.498025	3.24252	0.833377	0.181016	0.0351074	0.000653426	0.170218	0.104224	0.000907562	6.49448	5.02554	11.52
0.140667	0.145535	0.000373508	0.0211128	0.0401894	0.00405985	1.49284	4.66115	0.521648	0.0210477	0.000157472	0.000143927	0.371937	0.873248	0.000807735	6.96222	1.3327	8.29493
0.160276	0.0414747	0.000307177	0.308907	0.0933517	0.000749672	0.709016	0.388707	0.0077022	0.0225759	0.000305733	0.000353482	0.158413	0.144012	0.001101	1.30748	0.729769	2.03725
0.656291	0.558772	0.000879468	2.93352	1.31449	0.00757485	8.99672	2.64583	0.161284	0.0919096	0.00943292	0.000107469	1.1298	0.625915	0.00014067	13.0198	6.11289	19.1327
3.31417	0.337466	0.00132756	0.363957	0.155775	0.000237399	3.55406	4.58124	0.00073335	0.0192187	0.000305517	0.000102328	0.688991	0.908623	0.00208815	11.789	2.1393	13.9283
2.20478	1.86594	0.350653	0.830405	0.918854	0.119099	3.46247	4.67159	2.15659	0.0422817	0.00147448	0.000145647	0.908912	1.10032	0.0735175	14.712	3.99501	18.707
7.40681	0.584477	0.00106585	4.14371	0.43549	0.000521403	18.4004	1.87566	0.0271222	0.0135779	0.000224039	8.28669e-05	1.56683	0.174514	0.00157693	28.2956	6.33653	34.6321
0.50047	2.16136	0.419788	0.624069	3.50344	1.04178	0.798722	9.8713	4.0884	0.0900546	0.00752726	0.000625207	0.102816	0.520854	0.0151216	17.84	5.90628	23.7463
0.124618	0.130238	8.83084e-05	0.642154	0.472997	0.000935905	0.213109	1.61386	0.000954971	0.0526902	0.00738896	0.000755673	0.0799262	0.313321	0.000162009	2.08287	1.57033	3.6532
0.104829	0.00050295	7.83127e-05	0.408367	0.0451544	0.002207	0.152484	0.0436938	0.000618063	0.0136	8.48505e-05	0.000220727	0.00598973	0.000377539	0.000669837	0.302206	0.476671	0.778876
0.114462	2.23387	0.63028	0.159448	1.53273	0.889847	0.0994583	5.10932	2.66192	0.0197621	0.00103423	0.000456237	0.0224827	0.815549	0.0978883	10.8493	3.5392	14.3885
0.0907829	0.354203	0.00599896	0.0623225	0.0296873	0.00171993	0.0552485	0.823163	0.0171178	0.00767968	0.000235467	0.000937247	0.0167701	0.00783544	0.000251479	1.34651	0.127439	1.47395
